# Supplementary material
Source: publisher figshare collection journal article supplement (https://acs.figshare.com/ndownloader/files/5336635)
Supplement: Supplementary file 1 [file 5336635]

 
data_mn1857 
 
_audit_creation_method            SHELXL-97 
_chemical_name_systematic 
; 
 ? 
; 
_chemical_name_common             Ir(CO)~2~(OC(CH~3~)CHC(CH~3~)(p-tol)) 
_chemical_melting_point           ? 
_chemical_formula_moiety          'C14 H14 Ir N O3' 
_chemical_formula_sum 
 'C14 H14 Ir N O3' 
_chemical_formula_weight          436.46

loop_ 
 _atom_type_symbol 
 _atom_type_description 
 _atom_type_scat_dispersion_real 
 _atom_type_scat_dispersion_imag 
 _atom_type_scat_source 
 'C'  'C'   0.0033   0.0016 
 'International Tables Vol C Tables 4.2.6.8 and 6.1.1.4' 
 'H'  'H'   0.0000   0.0000 
 'International Tables Vol C Tables 4.2.6.8 and 6.1.1.4' 
 'N'  'N'   0.0061   0.0033 
 'International Tables Vol C Tables 4.2.6.8 and 6.1.1.4' 
 'O'  'O'   0.0106   0.0060 
 'International Tables Vol C Tables 4.2.6.8 and 6.1.1.4' 
 'Ir'  'Ir'  -1.4442   7.9887 
 'International Tables Vol C Tables 4.2.6.8 and 6.1.1.4' 
 
_symmetry_cell_setting            monoclinic 
_symmetry_space_group_name_H-M    'P 21/n' 
_symmetry_space_group_name_Hall   '-P 2yn' 
 
loop_ 
 _symmetry_equiv_pos_as_xyz 
 'x, y, z' 
 '-x+1/2, y+1/2, -z+1/2' 
 '-x, -y, -z' 
 'x-1/2, -y-1/2, z-1/2' 
 
_cell_length_a                    6.7210(7) 
_cell_length_b                    13.3517(13) 
_cell_length_c                    14.8909(15) 
_cell_angle_alpha                 90.00 
_cell_angle_beta                  90.053(5) 
_cell_angle_gamma                 90.00 
_cell_volume                      1336.3(2) 
_cell_formula_units_Z             4 
_cell_measurement_temperature     20(2) 
_cell_measurement_reflns_used     8860
_cell_measurement_theta_min       3.031
_cell_measurement_theta_max       31.495
 
_exptl_crystal_description        block 
_exptl_crystal_colour             orange
_exptl_crystal_size_max           0.33 
_exptl_crystal_size_mid           0.21 
_exptl_crystal_size_min           0.21 
_exptl_crystal_density_meas       ? 
_exptl_crystal_density_diffrn     2.170 
_exptl_crystal_density_method     'not measured' 
_exptl_crystal_F_000              824 
_exptl_absorpt_coefficient_mu     9.994 
_exptl_absorpt_correction_type    multi-scan
_exptl_absorpt_correction_T_min   0.0740 
_exptl_absorpt_correction_T_max   0.1231 
_exptl_absorpt_process_details    'SADABS 2.10 (Sheldrick, 2004)' 
 
_exptl_special_details 
; 
 ? 
; 
 
_diffrn_ambient_temperature       20(2) 
_diffrn_radiation_wavelength      0.71073 
_diffrn_radiation_type            MoK\a 
_diffrn_radiation_source          'fine-focus sealed tube' 
_diffrn_radiation_monochromator   graphite 
_diffrn_measurement_device_type   'Bruker ApexII' 
_diffrn_measurement_method        \w 
_diffrn_detector_area_resol_mean  8.3 
_diffrn_standards_number          0  
_diffrn_standards_interval_count  ? 
_diffrn_standards_interval_time   ? 
_diffrn_standards_decay_%         ? 
_diffrn_reflns_number             12240 
_diffrn_reflns_av_R_equivalents   0.0260 
_diffrn_reflns_av_sigmaI/netI     0.0305 
_diffrn_reflns_limit_h_min        -8 
_diffrn_reflns_limit_h_max        9 
_diffrn_reflns_limit_k_min        -19 
_diffrn_reflns_limit_k_max        19 
_diffrn_reflns_limit_l_min        -21 
_diffrn_reflns_limit_l_max        21 
_diffrn_reflns_theta_min          3.03 
_diffrn_reflns_theta_max          31.50 
_reflns_number_total              4352 
_reflns_number_gt                 4202 
_reflns_threshold_expression      I>2\s(I) 
 
_computing_data_collection        'Apex 2' 
_computing_cell_refinement        'SAINT v. 7.23A' 
_computing_data_reduction         SAINT 
_computing_structure_solution     'SHELXS-97 (Sheldrick, 1990)' 
_computing_structure_refinement   'SHELXL97 (Sheldrick, 1997)' 
_computing_molecular_graphics     'XP, SHELXTL 5.1(Sheldrick, 1994)' 
_computing_publication_material   SHELXL97 
 
_refine_special_details 
; 
 Refinement of F^2^ against ALL reflections.  The weighted R-factor wR and 
 goodness of fit S are based on F^2^, conventional R-factors R are based 
 on F, with F set to zero for negative F^2^. The threshold expression of 
 F^2^ > 2sigma(F^2^) is used only for calculating R-factors(gt) etc. and is 
 not relevant to the choice of reflections for refinement.  R-factors based 
 on F^2^ are statistically about twice as large as those based on F, and R- 
 factors based on ALL data will be even larger. The structure was refined
 as a pseudo-merohedral twin with twin law -1 0 0 0 -1 0 0 0 1 and a twin 
 parameter that refined to 0.3955(7).
; 
 
_refine_ls_structure_factor_coef  Fsqd  
_refine_ls_matrix_type            full 
_refine_ls_weighting_scheme       calc  
_refine_ls_weighting_details 
 'calc w=1/[\s^2^(Fo^2^)+(0.0098P)^2^+1.3059P] where P=(Fo^2^+2Fc^2^)/3' 
_atom_sites_solution_primary      direct 
_atom_sites_solution_secondary    difmap 
_atom_sites_solution_hydrogens    geom 
_refine_ls_hydrogen_treatment     constr 
_refine_ls_extinction_method      none 
_refine_ls_extinction_coef        ? 
_refine_ls_number_reflns          4352 
_refine_ls_number_parameters      176 
_refine_ls_number_restraints      0 
_refine_ls_R_factor_all           0.0189 
_refine_ls_R_factor_gt            0.0179 
_refine_ls_wR_factor_ref          0.0400 
_refine_ls_wR_factor_gt           0.0397 
_refine_ls_goodness_of_fit_ref    1.056 
_refine_ls_restrained_S_all       1.056 
_refine_ls_shift/su_max           0.000 
_refine_ls_shift/su_mean          0.000 
 
loop_ 
 _atom_site_label 
 _atom_site_type_symbol 
 _atom_site_fract_x 
 _atom_site_fract_y 
 _atom_site_fract_z 
 _atom_site_U_iso_or_equiv 
 _atom_site_adp_type 
 _atom_site_occupancy 
 _atom_site_symmetry_multiplicity 
 _atom_site_calc_flag 
 _atom_site_refinement_flags 
 _atom_site_disorder_assembly 
 _atom_site_disorder_group 
Ir1 Ir 0.261594(18) -0.031109(6) 0.014813(8) 0.00372(3) Uani 1 1 d . . . 
O1 O 0.2750(4) -0.16361(14) 0.17609(13) 0.0110(4) Uani 1 1 d . . . 
O2 O 0.2843(4) -0.22309(14) -0.08960(14) 0.0099(4) Uani 1 1 d . . . 
O3 O 0.2405(4) 0.04720(12) -0.10171(13) 0.0059(3) Uani 1 1 d . . . 
N1 N 0.2445(5) 0.09960(15) 0.08831(14) 0.0059(4) Uani 1 1 d . . . 
C1 C 0.2721(5) -0.11049(18) 0.11588(17) 0.0063(5) Uani 1 1 d . . . 
C2 C 0.2755(5) -0.1490(2) -0.05070(18) 0.0066(5) Uani 1 1 d . . . 
C3 C 0.2123(5) 0.1789(2) -0.20566(18) 0.0089(6) Uani 1 1 d . . . 
H3A H 0.3457 0.1784 -0.2322 0.011 Uiso 1 1 calc R . . 
H3B H 0.1587 0.2471 -0.2072 0.011 Uiso 1 1 calc R . . 
H3C H 0.1249 0.1342 -0.2399 0.011 Uiso 1 1 calc R . . 
C4 C 0.2239(5) 0.1435(2) -0.10981(18) 0.0062(5) Uani 1 1 d . . . 
C5 C 0.2191(6) 0.21138(19) -0.04017(19) 0.0073(6) Uani 1 1 d . . . 
H5 H 0.2058 0.2798 -0.0566 0.009 Uiso 1 1 calc R . . 
C6 C 0.2318(7) 0.19103(18) 0.05350(18) 0.0053(5) Uani 1 1 d . . . 
C7 C 0.2284(6) 0.28129(18) 0.11491(18) 0.0089(5) Uani 1 1 d . . . 
H7A H 0.0948 0.2893 0.1402 0.011 Uiso 1 1 calc R . . 
H7B H 0.2636 0.3414 0.0806 0.011 Uiso 1 1 calc R . . 
H7C H 0.3246 0.2717 0.1637 0.011 Uiso 1 1 calc R . . 
C8 C 0.2458(6) 0.09042(17) 0.18476(16) 0.0061(4) Uani 1 1 d . . . 
C9 C 0.0703(5) 0.1000(2) 0.2335(2) 0.0076(6) Uani 1 1 d . . . 
H9 H -0.0515 0.1130 0.2032 0.009 Uiso 1 1 calc R . . 
C10 C 0.0729(5) 0.0908(2) 0.3263(2) 0.0085(6) Uani 1 1 d . . . 
H10 H -0.0482 0.0971 0.3587 0.010 Uiso 1 1 calc R . . 
C11 C 0.2488(6) 0.07245(17) 0.37328(16) 0.0075(5) Uani 1 1 d . . . 
C12 C 0.4218(5) 0.0591(2) 0.3234(2) 0.0069(6) Uani 1 1 d . . . 
H12 H 0.5424 0.0435 0.3536 0.008 Uiso 1 1 calc R . . 
C13 C 0.4220(5) 0.0681(2) 0.2301(2) 0.0059(6) Uani 1 1 d . . . 
H13 H 0.5420 0.0591 0.1974 0.007 Uiso 1 1 calc R . . 
C14 C 0.2504(6) 0.06551(19) 0.47433(16) 0.0097(5) Uani 1 1 d . . . 
H14A H 0.1251 0.0919 0.4981 0.012 Uiso 1 1 calc R . . 
H14B H 0.3618 0.1048 0.4981 0.012 Uiso 1 1 calc R . . 
H14C H 0.2655 -0.0047 0.4924 0.012 Uiso 1 1 calc R . . 
 
loop_ 
 _atom_site_aniso_label 
 _atom_site_aniso_U_11 
 _atom_site_aniso_U_22 
 _atom_site_aniso_U_33 
 _atom_site_aniso_U_23 
 _atom_site_aniso_U_13 
 _atom_site_aniso_U_12 
Ir1 0.00510(4) 0.00366(4) 0.00240(5) 0.00013(3) 0.00040(5) -0.00028(4) 
O1 0.0156(12) 0.0107(8) 0.0066(9) 0.0020(7) 0.0005(9) 0.0004(10) 
O2 0.0129(12) 0.0081(8) 0.0087(9) -0.0004(7) 0.0000(8) 0.0010(8) 
O3 0.0080(10) 0.0055(7) 0.0042(8) 0.0008(6) -0.0008(10) -0.0008(10) 
N1 0.0084(11) 0.0050(8) 0.0044(9) 0.0008(7) 0.0021(11) 0.0010(12) 
C1 0.0060(13) 0.0067(10) 0.0061(11) -0.0028(8) 0.0013(11) 0.0013(11) 
C2 0.0080(14) 0.0100(10) 0.0018(10) 0.0019(9) -0.0013(11) 0.0006(11) 
C3 0.0117(16) 0.0102(11) 0.0048(12) 0.0031(9) 0.0008(10) 0.0008(11) 
C4 0.0045(14) 0.0076(10) 0.0066(11) 0.0016(9) 0.0002(10) -0.0005(11) 
C5 0.0105(18) 0.0062(9) 0.0053(11) 0.0005(9) 0.0005(11) 0.0016(12) 
C6 0.0046(13) 0.0057(9) 0.0056(11) 0.0016(8) 0.0008(13) 0.0002(13) 
C7 0.0141(15) 0.0057(9) 0.0068(11) -0.0001(9) 0.0001(12) -0.0016(12) 
C8 0.0102(12) 0.0044(8) 0.0038(10) -0.0002(8) -0.0003(13) -0.0033(14) 
C9 0.0071(14) 0.0065(13) 0.0091(14) -0.0007(12) -0.0009(10) 0.0014(11) 
C10 0.0116(14) 0.0074(13) 0.0067(14) 0.0005(13) 0.0016(11) -0.0004(11) 
C11 0.0113(13) 0.0053(9) 0.0058(11) -0.0001(8) 0.0008(14) -0.0011(13) 
C12 0.0083(14) 0.0056(13) 0.0068(14) -0.0005(12) -0.0010(11) 0.0007(11) 
C13 0.0078(14) 0.0048(12) 0.0051(14) -0.0016(11) 0.0009(10) -0.0016(10) 
C14 0.0128(13) 0.0112(10) 0.0052(12) 0.0009(9) 0.0000(15) -0.0002(12) 
 
_geom_special_details 
; 
 All esds (except the esd in the dihedral angle between two l.s. planes) 
 are estimated using the full covariance matrix.  The cell esds are taken 
 into account individually in the estimation of esds in distances, angles 
 and torsion angles; correlations between esds in cell parameters are only 
 used when they are defined by crystal symmetry.  An approximate (isotropic) 
 treatment of cell esds is used for estimating esds involving l.s. planes. 
; 
 
loop_ 
 _geom_bond_atom_site_label_1 
 _geom_bond_atom_site_label_2 
 _geom_bond_distance 
 _geom_bond_site_symmetry_2 
 _geom_bond_publ_flag 
Ir1 C1 1.842(3) . ? 
Ir1 C2 1.854(3) . ? 
Ir1 O3 2.0307(18) . ? 
Ir1 N1 2.063(2) . ? 
Ir1 Ir1 3.3402(4) 3_655 ? 
Ir1 Ir1 3.6396(4) 3 ? 
O1 C1 1.143(3) . ? 
O2 C2 1.148(3) . ? 
O3 C4 1.296(3) . ? 
N1 C6 1.329(3) . ? 
N1 C8 1.442(3) . ? 
C3 C4 1.506(4) . ? 
C3 H3A 0.9800 . ? 
C3 H3B 0.9800 . ? 
C3 H3C 0.9800 . ? 
C4 C5 1.378(4) . ? 
C5 C6 1.424(4) . ? 
C5 H5 0.9500 . ? 
C6 C7 1.513(3) . ? 
C7 H7A 0.9800 . ? 
C7 H7B 0.9800 . ? 
C7 H7C 0.9800 . ? 
C8 C9 1.392(4) . ? 
C8 C13 1.395(5) . ? 
C9 C10 1.388(5) . ? 
C9 H9 0.9500 . ? 
C10 C11 1.394(5) . ? 
C10 H10 0.9500 . ? 
C11 C12 1.392(5) . ? 
C11 C14 1.508(3) . ? 
C12 C13 1.395(5) . ? 
C12 H12 0.9500 . ? 
C13 H13 0.9500 . ? 
C14 H14A 0.9800 . ? 
C14 H14B 0.9800 . ? 
C14 H14C 0.9800 . ? 
 
loop_ 
 _geom_angle_atom_site_label_1 
 _geom_angle_atom_site_label_2 
 _geom_angle_atom_site_label_3 
 _geom_angle 
 _geom_angle_site_symmetry_1 
 _geom_angle_site_symmetry_3 
 _geom_angle_publ_flag 
C1 Ir1 C2 86.53(11) . . ? 
C1 Ir1 O3 175.54(10) . . ? 
C2 Ir1 O3 89.49(9) . . ? 
C1 Ir1 N1 93.18(9) . . ? 
C2 Ir1 N1 179.58(12) . . ? 
O3 Ir1 N1 90.79(7) . . ? 
C1 Ir1 Ir1 102.42(10) . 3_655 ? 
C2 Ir1 Ir1 95.32(10) . 3_655 ? 
O3 Ir1 Ir1 79.94(7) . 3_655 ? 
N1 Ir1 Ir1 85.04(9) . 3_655 ? 
C1 Ir1 Ir1 105.46(10) . 3 ? 
C2 Ir1 Ir1 100.33(10) . 3 ? 
O3 Ir1 Ir1 73.28(8) . 3 ? 
N1 Ir1 Ir1 79.45(9) . 3 ? 
Ir1 Ir1 Ir1 148.667(7) 3_655 3 ? 
C4 O3 Ir1 126.59(18) . . ? 
C6 N1 C8 117.8(2) . . ? 
C6 N1 Ir1 125.01(17) . . ? 
C8 N1 Ir1 117.15(15) . . ? 
O1 C1 Ir1 176.6(2) . . ? 
O2 C2 Ir1 178.6(2) . . ? 
C4 C3 H3A 109.5 . . ? 
C4 C3 H3B 109.5 . . ? 
H3A C3 H3B 109.5 . . ? 
C4 C3 H3C 109.5 . . ? 
H3A C3 H3C 109.5 . . ? 
H3B C3 H3C 109.5 . . ? 
O3 C4 C5 125.8(3) . . ? 
O3 C4 C3 113.8(2) . . ? 
C5 C4 C3 120.4(2) . . ? 
C4 C5 C6 127.6(2) . . ? 
C4 C5 H5 116.2 . . ? 
C6 C5 H5 116.2 . . ? 
N1 C6 C5 124.1(2) . . ? 
N1 C6 C7 119.8(2) . . ? 
C5 C6 C7 116.1(2) . . ? 
C6 C7 H7A 109.5 . . ? 
C6 C7 H7B 109.5 . . ? 
H7A C7 H7B 109.5 . . ? 
C6 C7 H7C 109.5 . . ? 
H7A C7 H7C 109.5 . . ? 
H7B C7 H7C 109.5 . . ? 
C9 C8 C13 119.1(2) . . ? 
C9 C8 N1 120.5(3) . . ? 
C13 C8 N1 120.3(3) . . ? 
C10 C9 C8 120.1(3) . . ? 
C10 C9 H9 120.0 . . ? 
C8 C9 H9 120.0 . . ? 
C9 C10 C11 121.7(3) . . ? 
C9 C10 H10 119.2 . . ? 
C11 C10 H10 119.2 . . ? 
C12 C11 C10 117.6(2) . . ? 
C12 C11 C14 121.3(3) . . ? 
C10 C11 C14 121.1(3) . . ? 
C11 C12 C13 121.5(3) . . ? 
C11 C12 H12 119.2 . . ? 
C13 C12 H12 119.2 . . ? 
C12 C13 C8 119.9(3) . . ? 
C12 C13 H13 120.0 . . ? 
C8 C13 H13 120.0 . . ? 
C11 C14 H14A 109.5 . . ? 
C11 C14 H14B 109.5 . . ? 
H14A C14 H14B 109.5 . . ? 
C11 C14 H14C 109.5 . . ? 
H14A C14 H14C 109.5 . . ? 
H14B C14 H14C 109.5 . . ? 
 
_diffrn_measured_fraction_theta_max    0.982 
_diffrn_reflns_theta_full              31.50 
_diffrn_measured_fraction_theta_full   0.982 
_refine_diff_density_max    1.829 
_refine_diff_density_min   -1.320 
_refine_diff_density_rms    0.155 
